# Supplementary material
Source: Elsevier journal article supplement (https://www.sciencedirect.com/science/article/pii/S1885585722002948)
Supplement: mmc1 [file S1885585722002948:mmc1.pdf]

SUPPLEMENTARY DATA

Table 1 of the supplementary data

Comparison of the Healthy Heart Score components between participants in the development cohorts (HPFS, NHS), CARDIA, JHS, and the validation (ENRICA) cohort<sup>a</sup>

|                                    | Men     |                |                                             |         |         | Women  |                |                |        |         |
|------------------------------------|---------|----------------|---------------------------------------------|---------|---------|--------|----------------|----------------|--------|---------|
|                                    | HPFS    | ENRICA         |                                             | CARDIA  | JHS     | NHS    | ENRICA         |                | CARDIA | JHS     |
|                                    |         | Overall cohort | Participants without prior chronic diseases |         |         |        | Overall cohort | Healthy cohort |        |         |
| Age, y                             | 52 ± 9  | 47 ± 16        | 45 ± 16                                     | 25 ± 4  | 52 ± 12 | 52 ± 7 | 48 ± 17        | 46 ± 16        | 25 ± 4 | 53 ± 13 |
| Smoking, %                         |         |                |                                             |         |         |        |                |                |        |         |
| Never                              | 49      | 39             | 40                                          | 57      | 62      | 44     | 56             | 54             | 57     | 78      |
| Past                               | 42      | 32             | 30                                          | 13      | 21      | 35     | 19             | 20             | 14     | 13      |
| Current                            | 9       | 29             | 30                                          | 30      | 17      | 21     | 25             | 26             | 29     | 9       |
| Body mass index, kg/m <sup>2</sup> | 25 ± 3  | 27 ± 4         | 27 ± 4                                      | 24 ± 4  | 29 ± 6  | 25 ± 4 | 26 ± 5         | 26 ± 5         | 25 ± 6 | 32 ± 7  |
| Waist circumference, cm            |         |                |                                             |         |         |        |                |                |        |         |
| Physical activity, h/wk            | 2 ± 2   | 4 ± 4          | 4 ± 4                                       | 3 ± 2   | 1 ± 2   | 2 ± 2  | 2 ± 2          | 2 ± 2          | 2 ± 2  | 1 ± 2   |
| Alcohol, g/d                       | 11 ± 14 | 14 ± 19        | 13 ± 19                                     | 13 ± 17 | 8 ± 18  | 6 ± 10 | 4 ± 10         | 4 ± 10         | 5 ± 10 | 2 ± 7   |
| Dietary components, serving/d      |         |                |                                             |         |         |        |                |                |        |         |
| Fruit and vegetables               | 5 ± 3   | 3 ± 2          | 3 ± 2                                       | 3 ± 2   | 7 ± 4   | 6 ± 3  | 3 ± 2          | 3 ± 2          | 4 ± 3  | 7 ± 5   |
| Sugar-sweetened beverages          | 0 ± 1   | 1 ± 1          | 1 ± 1                                       | 2 ± 2   | 2 ± 2   | 0 ± 1  | 1 ± 1          | 1 ± 1          | 1 ± 2  | 2 ± 2   |

Sotos-Prieto M, et al. Performance and validation of the Healthy Heart Score Model for predicting 12-year cardiovascular mortality in a nationwide Mediterranean population

|                                  |       |       |       |        |         |         |         |         |         |         |
|----------------------------------|-------|-------|-------|--------|---------|---------|---------|---------|---------|---------|
| Red and processed meats          | 1 ± 1 | 2 ± 1 | 2 ± 1 | 3 ± 2  | 3 ± 2   | 1 ± 1   | 1 ± 1   | 1 ± 1   | 3 ± 2   | 2 ± 2   |
| Cereal fiber, g/d                | 6 ± 3 | 9 ± 4 | 9 ± 4 | 3 ± 3  | 2 ± 3   | 4 ± 2   | 8 ± 4   | 8 ± 4   | 3 ± 3   | 2 ± 3   |
| Nuts                             | 1 ± 1 | 0 ± 1 | 0 ± 1 | 1 ± 1  | 0.5 ± 1 | 0.3 ± 1 | 0.2 ± 1 | 0.2 ± 1 | 0.5 ± 1 | 0.4 ± 1 |
| Diet score                       | 1 ± 2 | 0 ± 2 | 0 ± 2 | -4 ± 4 | -4 ± 4  | 4 ± 2   | 1.5 ± 3 | 1.5 ± 3 | -3 ± 5  | -2 ± 5  |
| Healthy Heart Score <sup>b</sup> | 7     | 7 ± 1 | 7 ± 1 | 5 ± 1  | 8 ± 1   | 7       | 7 ± 2   | 6 ± 2   | 4 ± 1   | 7 ± 1   |

CARDIA, Coronary Artery Risk Development in Young Adults; ENRICA, Study on Nutrition and Cardiovascular Risk in Spain; HPFS, Health Professionals Follow-up Study; JHS, Jackson Heart Study; NHS, Nurses’ Health Study.

<sup>a</sup>Unless otherwise indicated, data are expressed as mean ± standard deviation.

<sup>b</sup>Standard deviations for mean Healthy Heart Score values were not available in the original publication by Chiuve et al.<sup>1</sup>

**Table 2 of the supplementary data**

Performance of the HHS in all-cause mortality prediction at mean follow-up (12 years) in the ENRICA cohort

|                                                    | Men               | Women             |
|----------------------------------------------------|-------------------|-------------------|
|                                                    | Total (n = 5649)  | Total (n = 6292)  |
| <i>Overall cohort</i>                              |                   |                   |
| All-cause mortality                                | 525 (9.29)        | 413 (6.56)        |
| HHS association, HR                                | 3.9 (3.1, 4.9)    | 3.2 (2.7, 3.9)    |
| <i>Calibration</i>                                 |                   |                   |
| Slope (95%CI)                                      | 1.4 (1.3, 1.5)    | 1.05 (0.97, 1.13) |
| <i>Discrimination</i>                              |                   |                   |
| Harrel c-statistic                                 | 0.88 (0.86, 0.89) | 0.88 (0.86, 0.89) |
| Gonen & Heller smoothed c-statistic                | 0.84 (0.83, 0.85) | 0.83 (0.82, 0.84) |
|                                                    |                   |                   |
| <i>Participants without prior chronic diseases</i> | Total (n = 4794)  | Total (n = 5434)  |
| All-cause mortality                                | 304 (6.34)        | 260 (4.78)        |
| HHS association, HR                                | 4.0 (3.5, 4.5)    | 3.0 (2.7, 3.3)    |
| <i>Calibration</i>                                 |                   |                   |
| Slope                                              | 1.4 (1.3, 1.5)    | 1.1 (1.0, 1.2)    |
| <i>Discrimination</i>                              |                   |                   |
| Harrel c-statistic                                 | 0.88 (0.86, 0.89) | 0.89 (0.87, 0.91) |
| Gonen & Heller smoothed c-statistic                | 0.84 (0.82, 0.85) | 0.83 (0.82, 0.84) |

95%CI, 95% confidence interval; HHS, Healthy Heart Score; HR, hazard ratio.

The data are expressed as No. (%) or c-statistic (95%CI)

**Figure 1 of the supplementary data**

Formula to estimate the 20-year Risk of CVD based on lifestyle predictors in women (Nurses' Health Study) and men (Health Professionals Follow-up)

|                                                                                                                                                                                                                                                                                                                                                                                                                                                                                                                                                                                                                                                                                                                                                                                                                                                                           |
|---------------------------------------------------------------------------------------------------------------------------------------------------------------------------------------------------------------------------------------------------------------------------------------------------------------------------------------------------------------------------------------------------------------------------------------------------------------------------------------------------------------------------------------------------------------------------------------------------------------------------------------------------------------------------------------------------------------------------------------------------------------------------------------------------------------------------------------------------------------------------|
| <b>WOMEN</b>                                                                                                                                                                                                                                                                                                                                                                                                                                                                                                                                                                                                                                                                                                                                                                                                                                                              |
| <p><b>20-year CVD risk (%) "Healthy Heart Score"</b> = <math>[1 - 0.9660^{\exp [W - 6.57301]}] \times 100\%</math></p> <p>where <math>W = 0.10820 \times \text{age} + 0.15285 \text{ (if past smoker)} + 0.90138 \text{ (if current smoker)} + 0.04676 \times \text{BMI} - 0.01923 \times \text{g/d of alcohol} + 0.0004 \times (\text{g/d of alcohol})^2 - 0.02951 \times \text{h/wk of physical activity} - 0.05113 \times \text{diet score}^*</math></p> <p>*Diet score = <math>(0.03326 \times \text{g/d of cereal fiber} + 0.18283 \text{ [if fruits + vegetables} \geq 3 \text{ servings/d]} + 0.14522 \text{ [if nuts } 0.1\text{-}1 \text{ servings/d]} + 0.2444 \text{ [if nuts } &gt; 1 \text{ servings/d]} - 0.14631 \times \text{servings/d of sugar-sweetened beverages} - 0.15624 \times \text{servings/d of red and processed meats}) \times 10</math></p> |
| <b>MEN</b>                                                                                                                                                                                                                                                                                                                                                                                                                                                                                                                                                                                                                                                                                                                                                                                                                                                                |
| <p><b>20-year CVD risk (%) "Healthy Heart Score"</b> = <math>[1 - 0.96368^{\exp [W - 7.2437]}] \times 100\%</math></p> <p>where <math>W = 0.13580 \times \text{age} - 0.0005 \times (\text{age})^2 + 0.06979 \text{ (if past smoker)} + 0.42305 \text{ (if current smoker)} + 0.07424 \times \text{BMI} - 0.00898 \times \text{g/d of alcohol} + 0.0001 \times (\text{grams/d of alcohol})^2 - 0.01755 \times \text{h/wk of physical activity} - 0.06691 \times \text{diet score}^*</math></p>                                                                                                                                                                                                                                                                                                                                                                            |

\*Diet score =  $(0.01816 \times \text{g/d of cereal fiber} + 0.08819 [\text{if fruits + vegetables} \geq 3 \text{ servings/d}] + 0.00535 [\text{if nuts } 0.1\text{-}1 \text{ servings/d}] + 0.14285 [\text{if nuts} > 1 \text{ servings/d}] - 0.14734 \times \text{servings/d of sugar-sweetened beverages} - 0.07112 \times \text{servings/d of red and processed meats}) \times 10$

BMI, body mass index; CVD, cardiovascular disease.

**Figure 2 of the supplementary data**

Flow diagram of included participants from the ENRICA study.

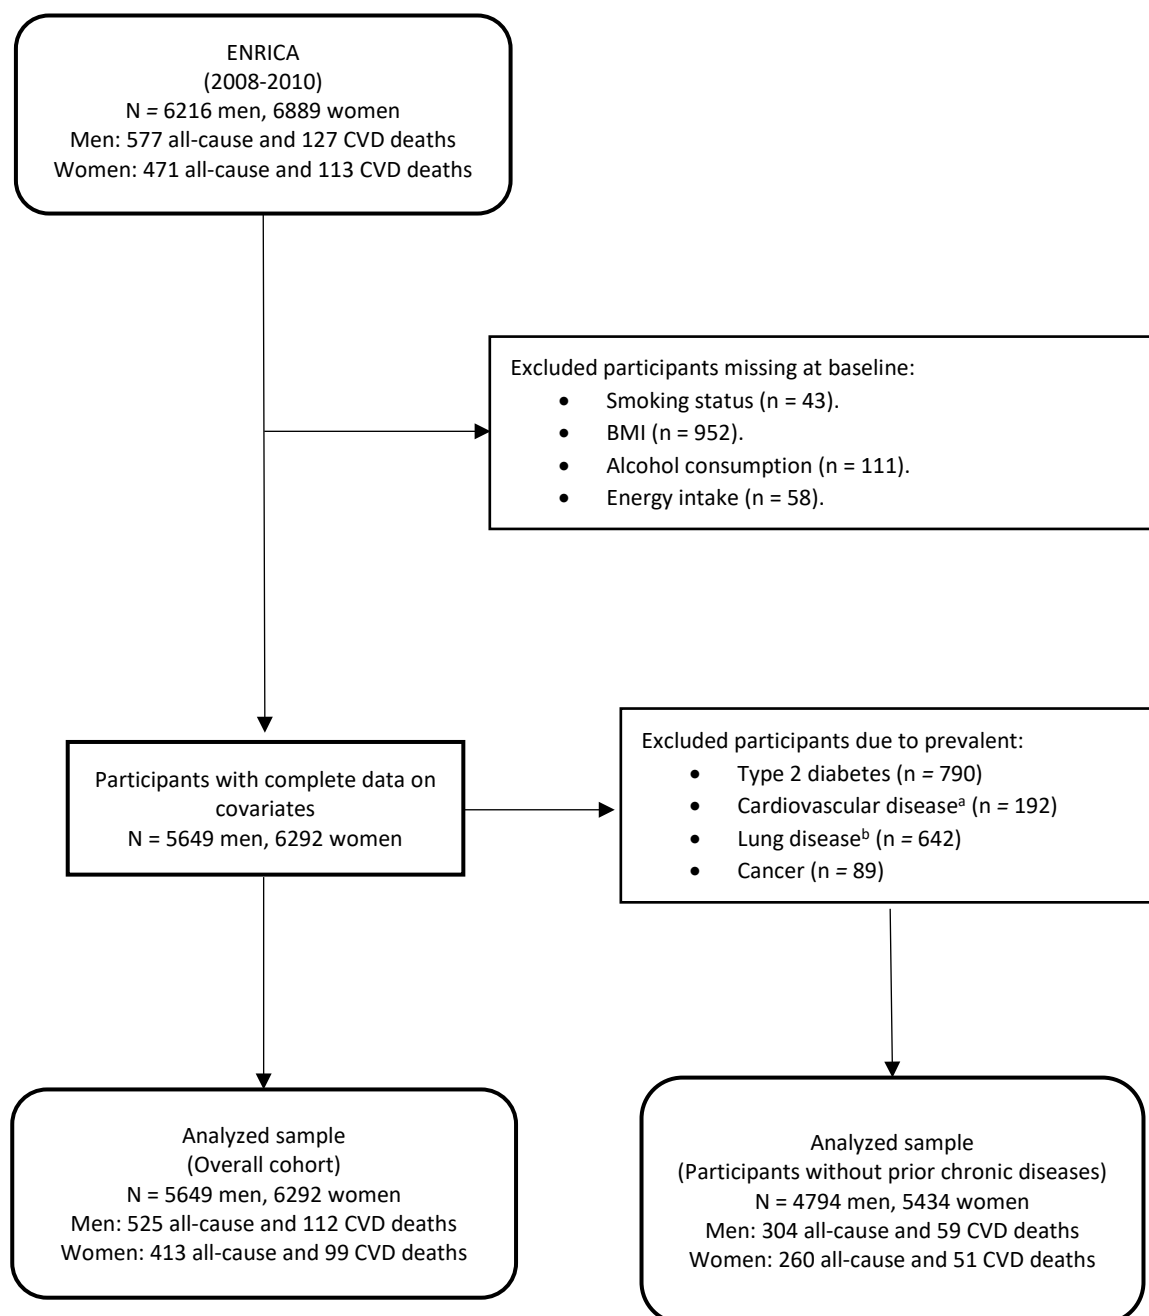

BMI, body mass index; CVD, cardiovascular disease.

<sup>a</sup>Myocardial infarction, heart failure, or stroke.

<sup>b</sup>Asthma, chronic obstructive pulmonary disease.

**Figure 3 of the supplementary data**

Formula to estimate the 12-year risk of CVD death based on lifestyle predictors in women and men from the ENRICA cohort (adjusting only the baseline survival).

|                                                                                                                                                                                                                                                                                                                                                                                                                                                                                                                                                                                                                                                                                                                                                                                                                                                                                                                                             |
|---------------------------------------------------------------------------------------------------------------------------------------------------------------------------------------------------------------------------------------------------------------------------------------------------------------------------------------------------------------------------------------------------------------------------------------------------------------------------------------------------------------------------------------------------------------------------------------------------------------------------------------------------------------------------------------------------------------------------------------------------------------------------------------------------------------------------------------------------------------------------------------------------------------------------------------------|
| <b>WOMEN</b>                                                                                                                                                                                                                                                                                                                                                                                                                                                                                                                                                                                                                                                                                                                                                                                                                                                                                                                                |
| <p><b>12-year CVD risk (%) “Healthy Heart Score-CVDm”</b> = <math>[1 - 0.9999937^{(\exp(W))}] \times 100\%</math></p> <p>where <math>W = 0.10820 \times \text{age} + 0.15285 \text{ (if past smoker)} + 0.90138 \text{ (if current smoker)} + 0.04676 \times \text{BMI}</math><br/> <math>- 0.01923 \times \text{g/d of alcohol} + 0.0004 \times (\text{grams/d of alcohol})^2 - 0.02951 \times \text{hs/wk of physical activity}</math><br/> <math>- 0.05113 \times \text{diet score}^*</math></p> <p>*Diet score = <math>(0.03326 \times \text{g/d of cereal fiber} + 0.18283 \text{ [if fruits + vegetables} \geq 3 \text{ servings/d]} + 0.14522</math><br/> <math>\text{[if nuts 0.1-1 servings/d]} + 0.2444 \text{ [if nuts } &gt; 1 \text{ servings/d]} - 0.14631 \times \text{servings/d of sugar-sweetened}</math><br/> <math>\text{beverages} - 0.15624 \times \text{servings/d of red and processed meats}) \times 10</math></p> |
| <b>MEN</b>                                                                                                                                                                                                                                                                                                                                                                                                                                                                                                                                                                                                                                                                                                                                                                                                                                                                                                                                  |
| <p><b>12-year CVD risk (%) “Healthy Heart Score-CVDm”</b> = <math>[1 - 0.9999935^{(\exp(W))}] \times 100\%</math></p> <p>where <math>W = 0.13580 \times \text{age} - 0.0005 \times (\text{age})^2 + 0.06979 \text{ (if past smoker)} + 0.42305 \text{ (if current smoker)}</math><br/> <math>+ 0.07424 \times \text{BMI} - 0.00898 \times \text{g/d of alcohol} + 0.0001 \times (\text{g/d of alcohol})^2 - 0.01755 \times \text{h/wk of physical}</math><br/> <math>\text{activity} - 0.06691 \times \text{diet score}^*</math></p>                                                                                                                                                                                                                                                                                                                                                                                                        |

\*Diet score =  $(0.01816 \times \text{g/d of cereal fiber} + 0.08819 [\text{if fruits + vegetables} \geq 3 \text{ servings/d}] + 0.00535 [\text{if nuts } 0.1\text{-}1 \text{ servings/d}] + 0.14285 [\text{if nuts} > 1 \text{ servings/d}] - 0.14734 \times \text{servings/d of sugar-sweetened beverages} - 0.07112 \times \text{servings/d of red and processed meats}) \times 10$

BMI, body mass index; CVD, cardiovascular disease; CVDm, cardiovascular disease model.

Figure 4 of the supplementary data

Calibration plots (95%CI) of the HHS for the prediction of CVD mortality at mean follow-up (12 years) among the overall ENRICA cohort and in participants without prior chronic diseases<sup>a</sup> using the same baseline survival as in the original cohort for CVD risk at 20 years (ie, assuming all events occurred in the first 12 years of follow-up).

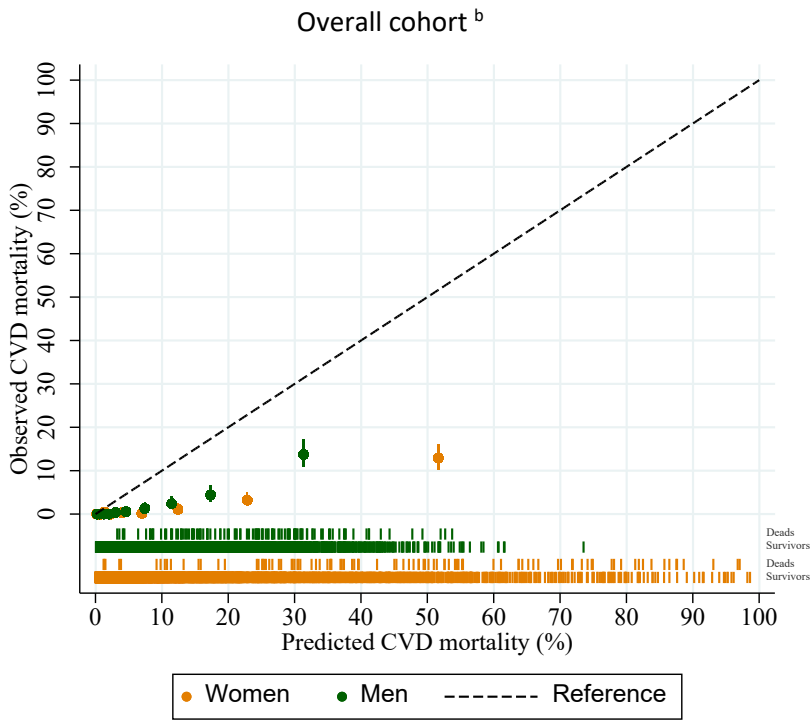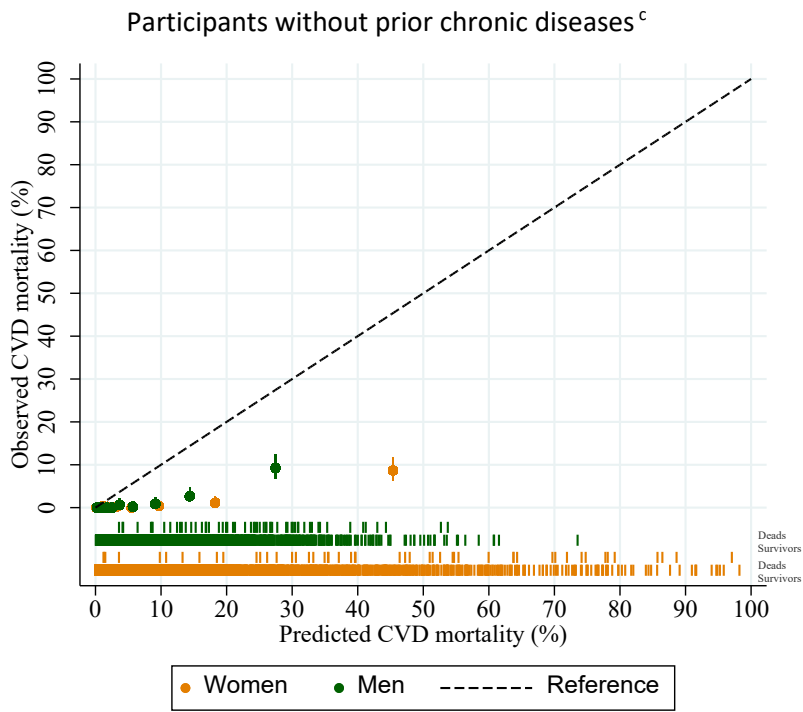

95%CI, 95% confidence interval; HHS, Healthy Heart Score; CVDm, cardiovascular disease model; CVD, cardiovascular disease.

<sup>a</sup>Participants free of type 2 diabetes, cardiovascular disease (myocardial infarction, heart failure, stroke), lung disease (asthma, chronic obstructive pulmonary disease), and cancer at baseline.

<sup>b</sup>n = 211/N = 11941 (men 112/5649, women 99/6292).

<sup>c</sup>n = 110/N = 10228 (men 59/4794, women 51/5434). Baseline survival function for men, 0.96368; baseline survival function for women 0.9660.

Cambios a la figura 4

Cambiar “Deads” por “Nonsurvivors”

Figure 5 of the supplementary data

Calibration plots (95%CI) of the HHS for the prediction of CVD mortality at mean follow-up (12 years) among ENRICA participants assuming a 12-year baseline survival function 4 times higher than at 20 years in the original development cohorts (ie, assuming most of the events occurred beyond 12 years of follow-up).

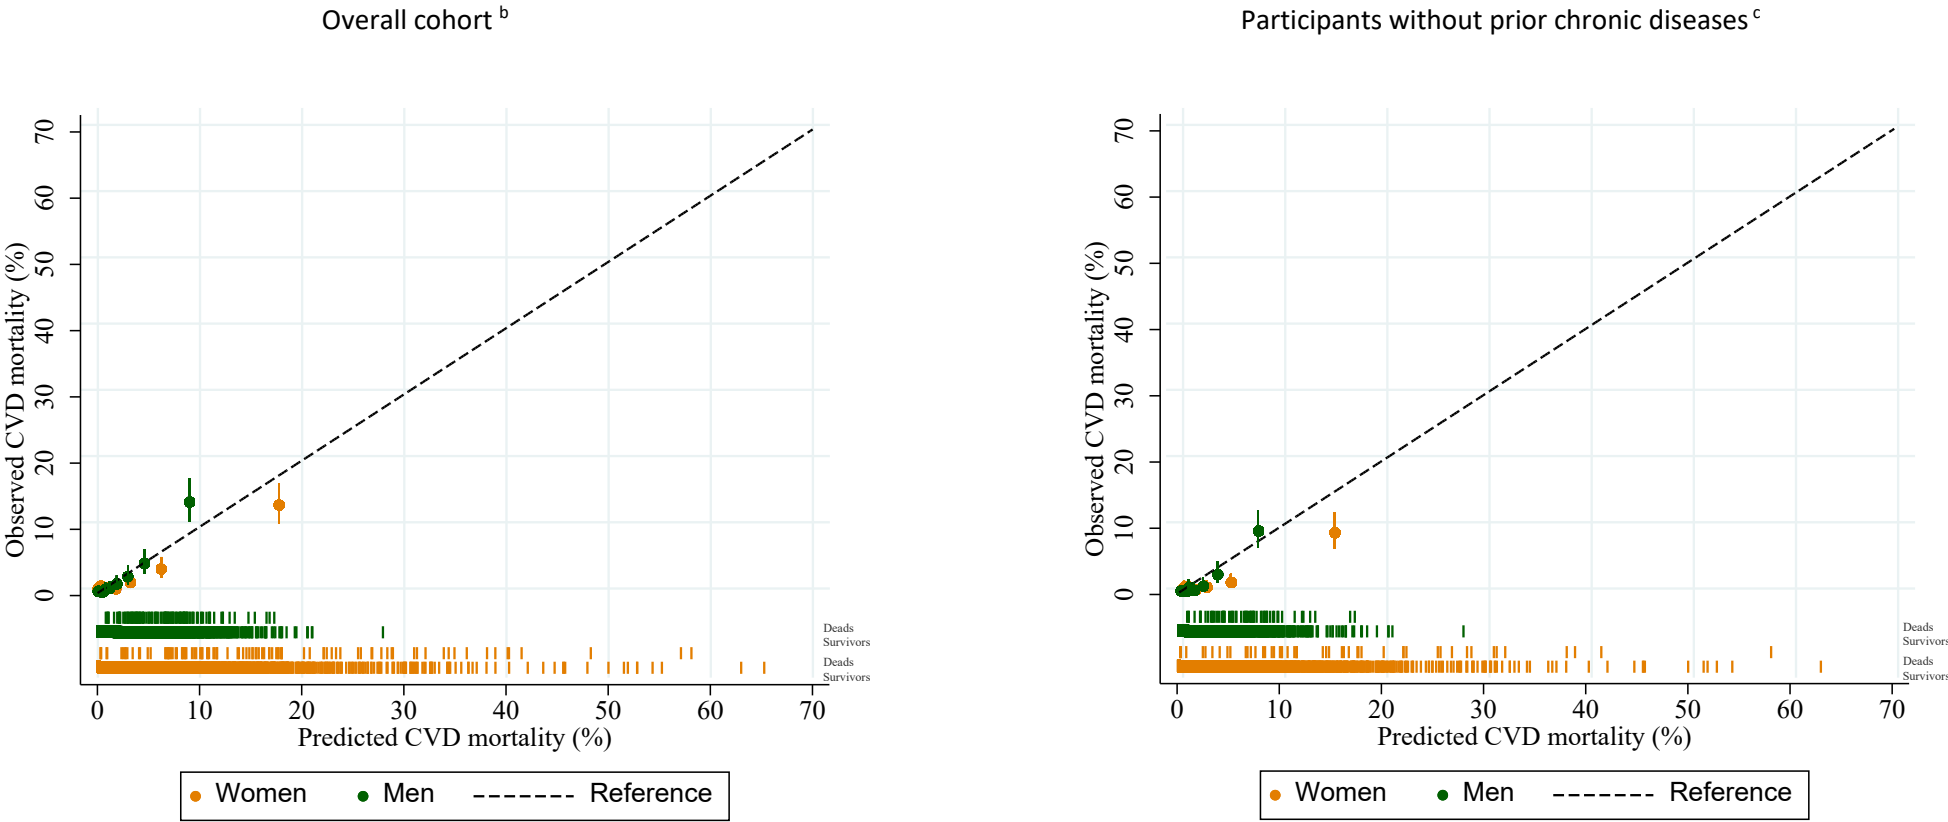

95%CI, 95% confidence interval; HHS, Healthy Heart Score; CVDm, cardiovascular disease model; CVD, cardiovascular disease.

<sup>a</sup>Participants free of type 2 diabetes, cardiovascular disease (myocardial infarction, heart failure, stroke), lung disease (asthma, chronic obstructive pulmonary disease), and cancer at baseline

<sup>b</sup>n = 211/N = 11 941 (men 112/5649, women 99/6292).

<sup>c</sup>n = 110/N = 10 228 (men 59/4794, women 51/5434). Baseline survival function for men, 0.99092; baseline survival function for women 0.9915.

Cambios a la figura 5

Cambiar “Deaths” por “Nonsurvivors”

Figure 6 of the supplementary data

Calibration plots of HHS for the prediction of all-cause mortality at mean follow-up (12 years) among the overall ENRICA cohort and for a subset of participants without prior chronic diseases (apparently “healthy participants”) <sup>a</sup> using the same baseline survival as in the original cohort for CVD-risk at 20 years.

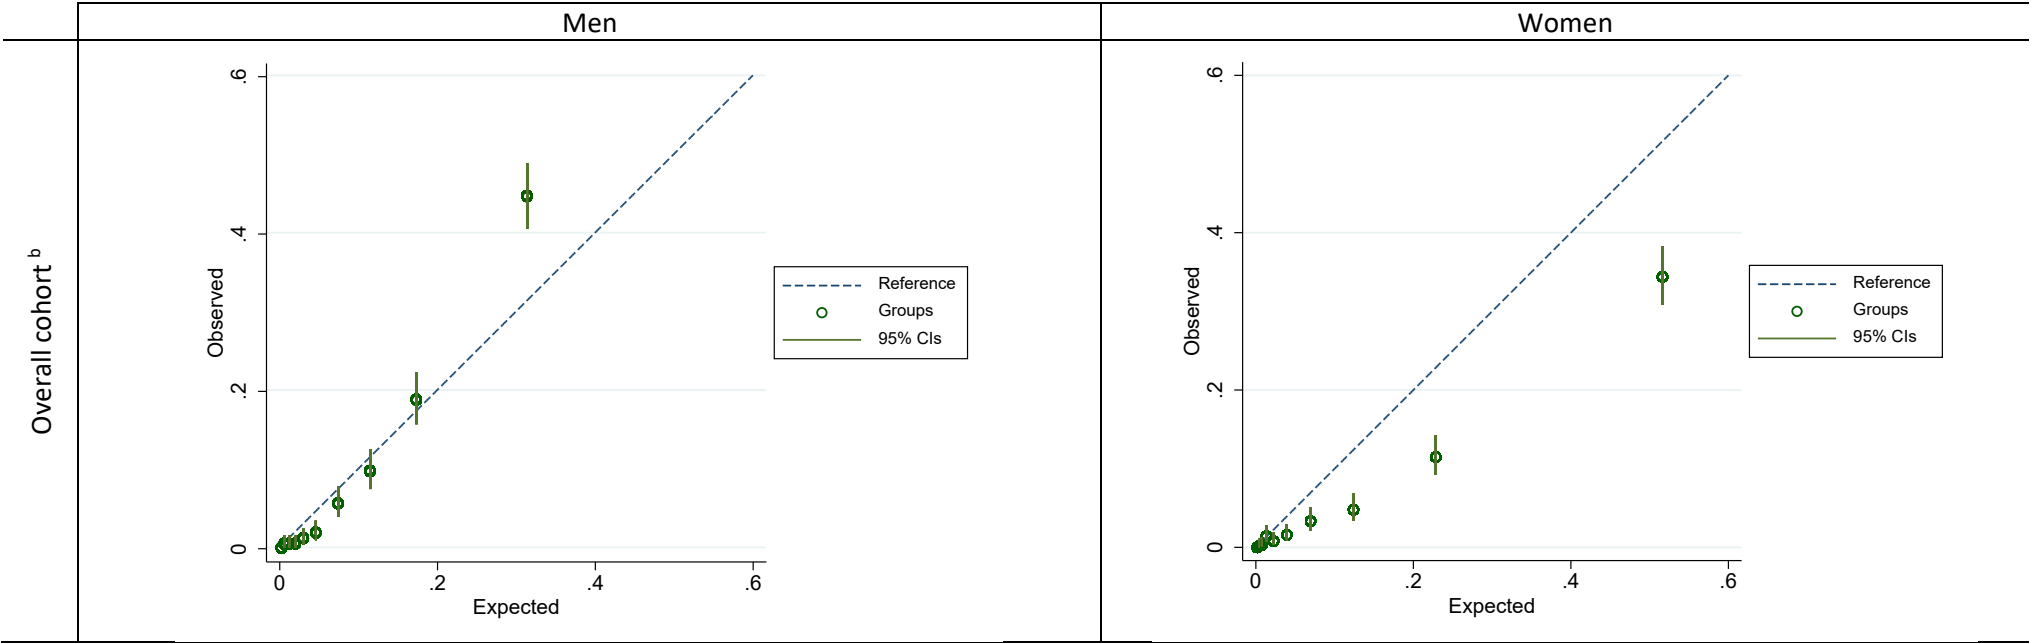

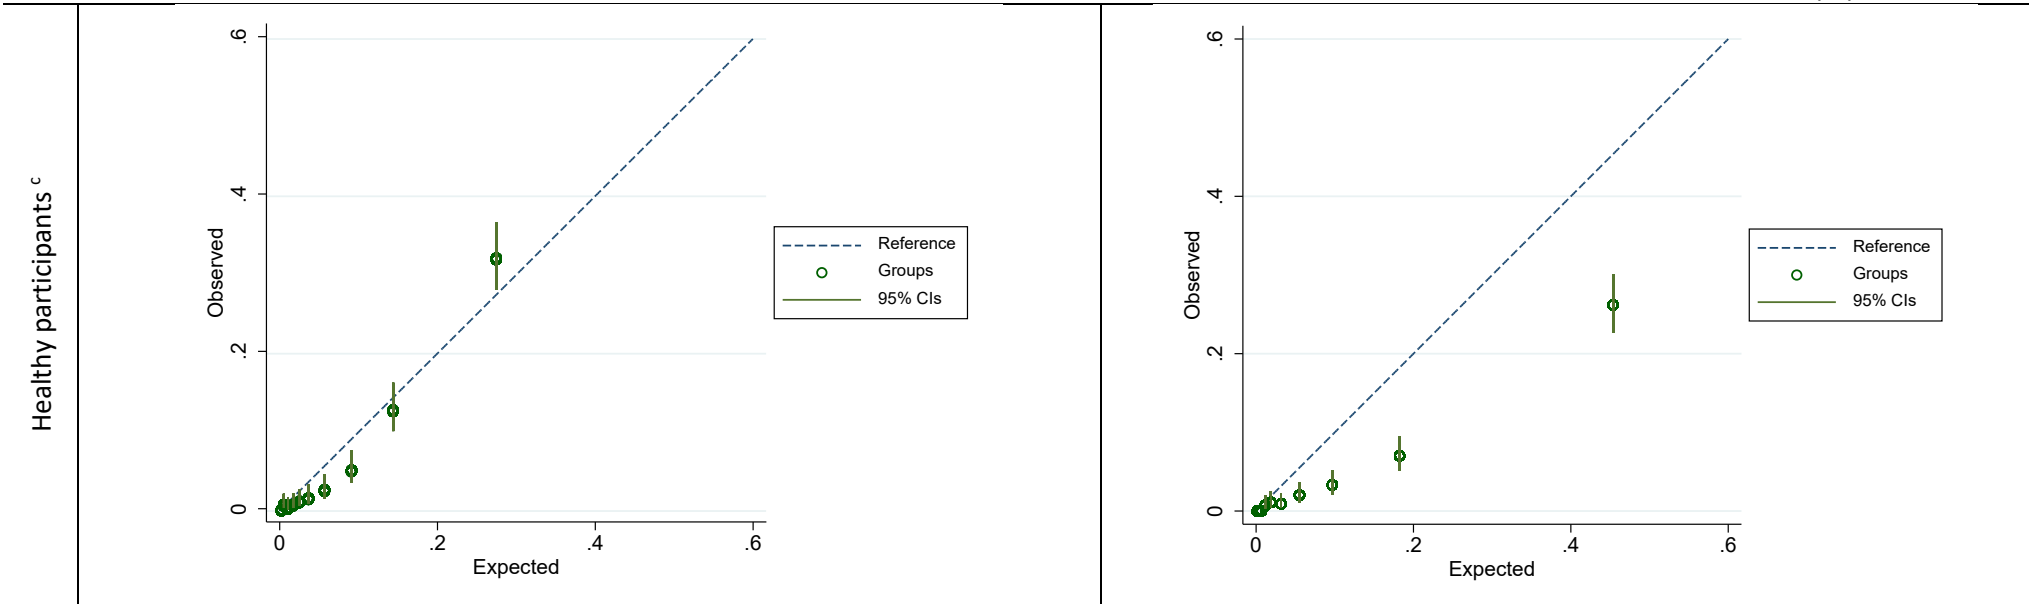

95%CI, 95%confidence interval; HHS, Healthy Hearth Score; CVD, cardiovascular disease.

<sup>a</sup> Participants free of type 2 diabetes, cardiovascular disease (myocardial infarction, heart failure, stroke), lung disease (asthma, chronic obstructive pulmonary disease), and cancer at baseline.

<sup>b</sup> n = 708 / N = 11 941 (men 410/5649, women 298/6292).

<sup>c</sup> n = 412 / N=10 228 (men 229/4794, women 183/5434). Baseline survival function for men, 0.96368; baseline survival function for women 0.9660.

Corrección a la figura 6

*Sotos-Prieto M, et al. Performance and validation of the Healthy Heart Score Model for predicting 12-year cardiovascular mortality in a nationwide Mediterranean population*

Cambiar “Reference Groups” por “Reference groups”

Cambiar “95% CI” a “95%CI”.

Figure 7 of the supplementary data

Calibration plots of HHS-CVDm for the prediction of all-cause mortality at mean follow-up (12 years) among the overall ENRICA cohort and for a subset of participants without prior chronic diseases (apparently “healthy participants”)a recalibrating by the baseline survival function of the ENRICA cohort.

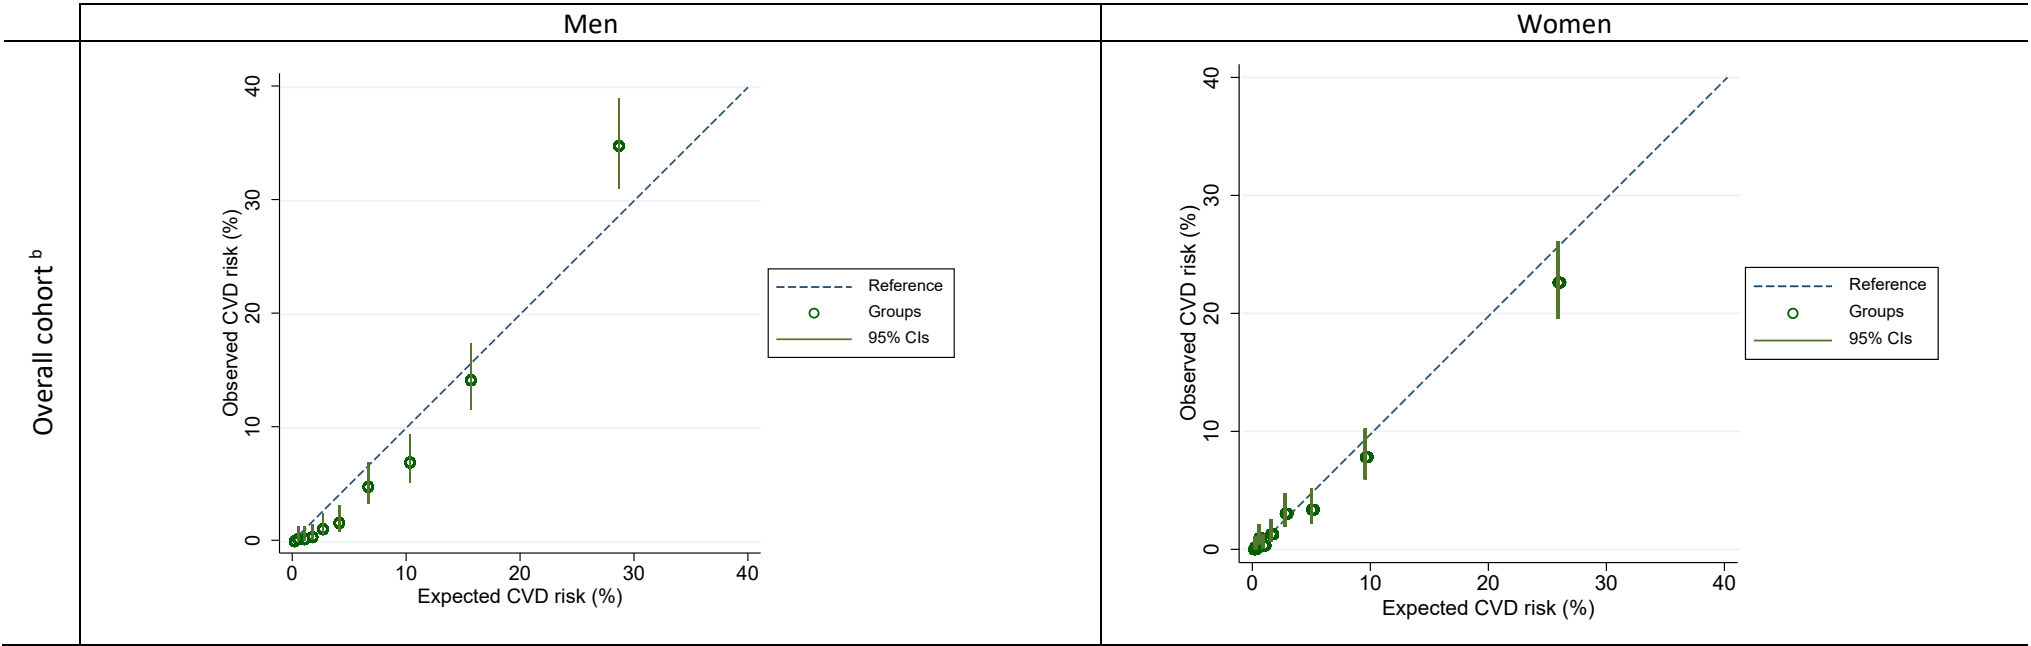

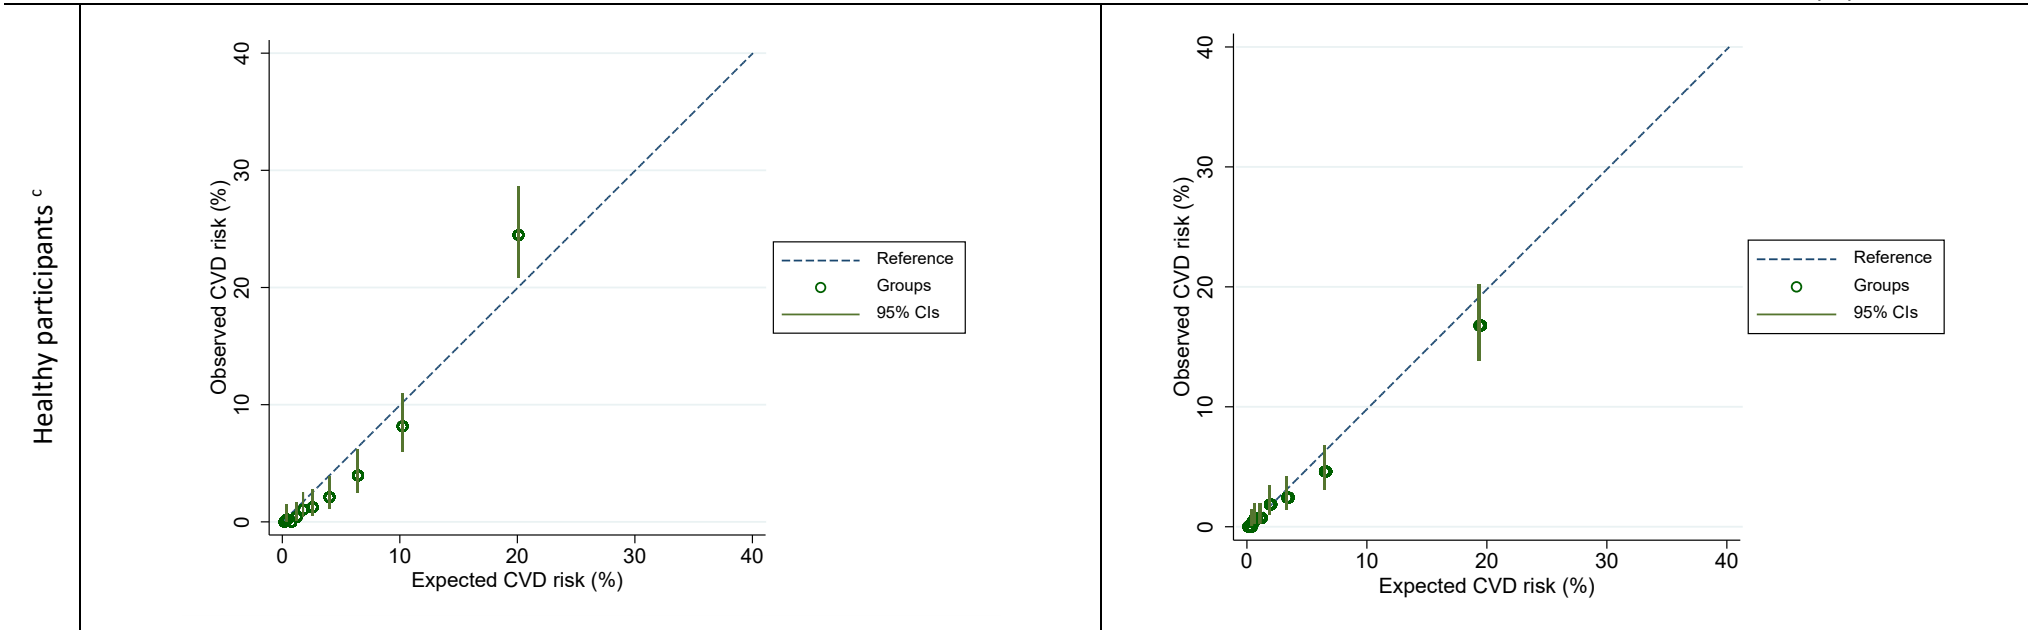

95%CI, 95%confidence interval; HHS, Healthy Hearth Score; CVD, cardiovascular disease.

<sup>a</sup>Participants free of type 2 diabetes, cardiovascular disease (myocardial infarction, heart failure, stroke), lung disease (asthma, chronic obstructive pulmonary disease), and cancer at baseline.

<sup>b</sup>n = 708/N=11 941 (men 410/5649, women 298/6292).

<sup>c</sup>n = 412/N=10 228 (men 229/4794, women 183/5434). Baseline survival function for men, 0.9999935; baseline survival function for women 0.9999937.

Corrección a la figura 6

Cambiar “Reference Groups” por “Reference groups”

Cambiar “95% CI” a “95%CI”.

*Sotos-Prieto M, et al. Performance and validation of the Healthy Heart Score Model for predicting 12-year cardiovascular mortality in a nationwide Mediterranean population*

### **References of the supplementary data**

1. Chiuve SE, Cook NR, Shay CM, et al. Lifestyle-based prediction model for the prevention of CVD: the Healthy Heart Score. *J Am Heart Assoc*. 2014.  
<https://doi.org/10.1161/JAHA.114.000954>.
